# Supplementary material for: A highly selective fluorescence sensor for cysteine/homocysteine and its application in bioimaging
Source: Royal Society of Chemistry journal article supplement (doi:10.1039/c5ra03011k), 2015-01-01
Supplement: c5ra03011k1.pdf [file c5ra03011k1.pdf]

## Electronic Supplementary Information

§ Tao Liu, <sup>a</sup> Fangjun Huo,<sup>\*b</sup> Caixia Yin,<sup>\*a</sup> § JianFang Li, <sup>a</sup> Lixi Niu <sup>c</sup>

<sup>a</sup>*Institute of Molecular Science, Shanxi University, Taiyuan, 030006, China.*

<sup>b</sup>*Research Institute of Applied Chemistry, Shanxi University, Taiyuan, 030006, China.*

<sup>c</sup>*Institute of Biotechnology, Shanxi University, Taiyuan 030006, PR China.*

E-mail: [yincx@sxu.edu.cn](mailto:yincx@sxu.edu.cn); [huoffj@sxu.edu.cn](mailto:huoffj@sxu.edu.cn)

**Figure S1:** The characterization data of the probe

**Figure S2:** The UV–vis and fluorescence titration spectra of Cys and GSH

**Figure S3:** The UV–vis and fluorescence titration spectra of ME and MPA

**Figure S4:** The UV–vis and fluorescence titration spectra of probe when all kinds of analytes added

**Figure S5:** The detection limits of Cys

**Figure S6:** Kinetic study of the response of the probe to Hcy and Cys at 25 °C

**Figure S7:** Choice of pH range for the measurements

**Figure S8:** ESI-MS spectra of the probe-ME adduct

**Figure S1:** 1D  $^1\text{H}$  NMR,  $^{13}\text{C}$  NMR, ESI-MS, and crystal structure spectra of the probe.

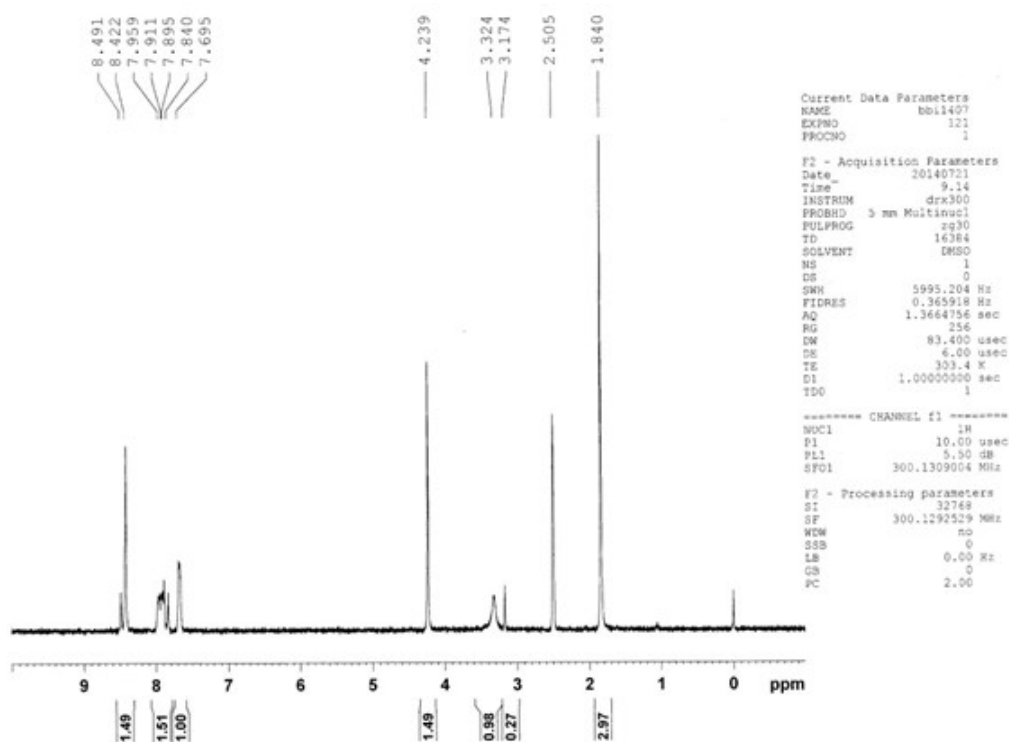

The  $^1\text{H}$  NMR (300MHz) spectra of the **probe** in DMSO

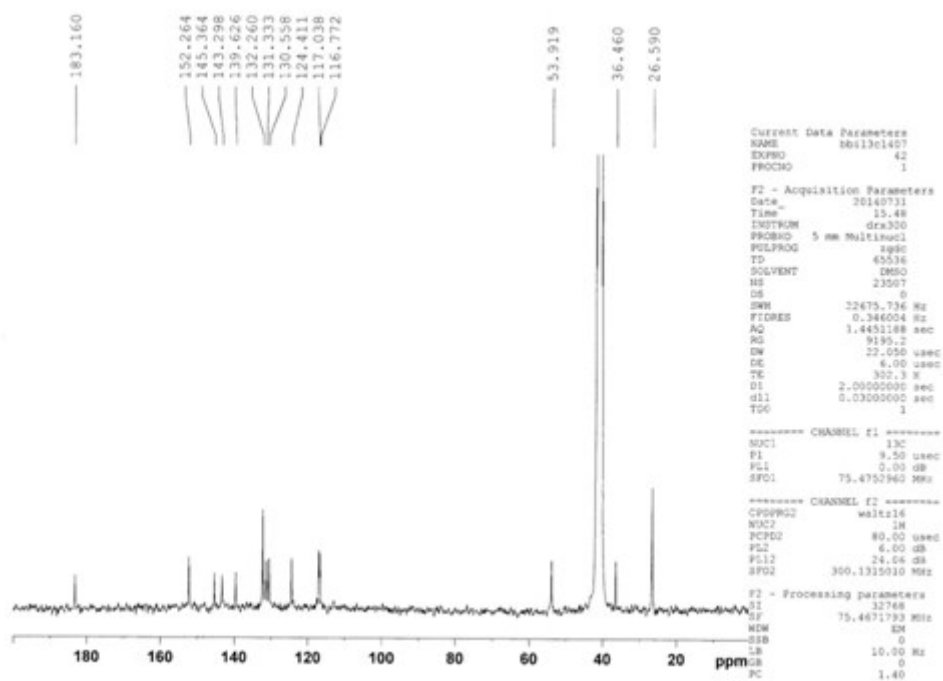

The  $^{13}\text{C}$  NMR (75 MHz) spectra of the **probe** in DMSO

10\_ + #96 RT: 0.24 AV: 1 NL: 7.14E4  
T: ITMS + p ESI Full ms [50.00-1000.00]

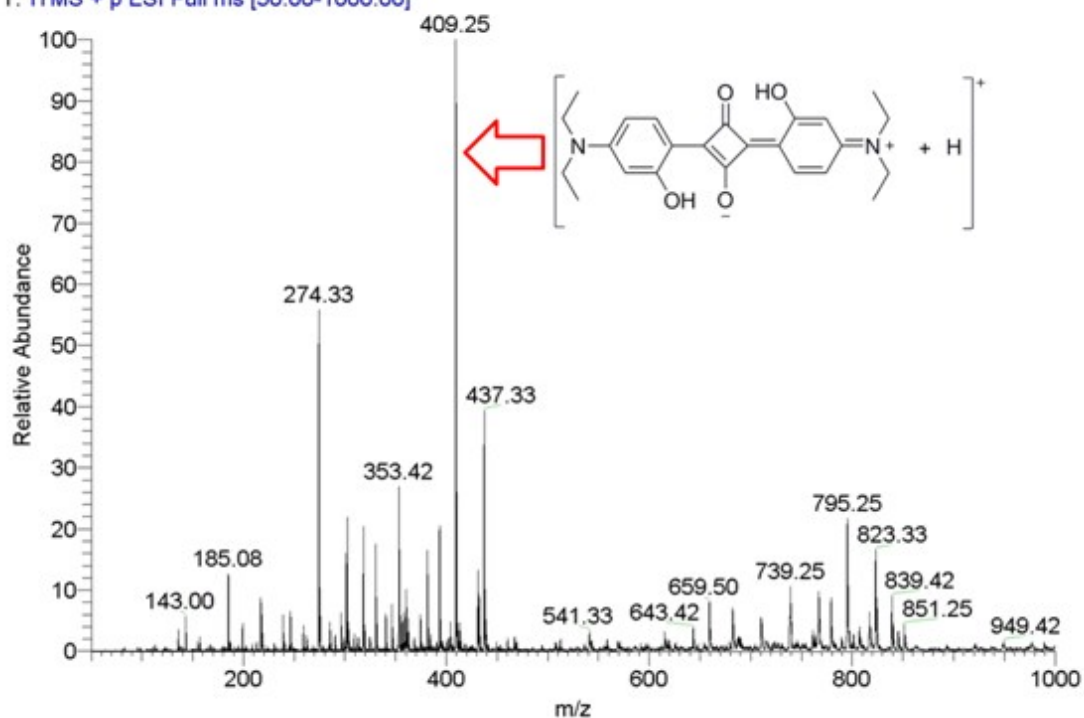

ESI-MS of the probe: HRMS (ESI-TOF) m/z: [probe + H]<sup>+</sup> Calcd for C<sub>24</sub>H<sub>28</sub>N<sub>2</sub>O<sub>4</sub> 409.21, Found 409.25, the data was measured with GCT-MS (Waters) instrument.

**Figure S2:** The UV–vis and fluorescence titration spectra of Cys and GSH

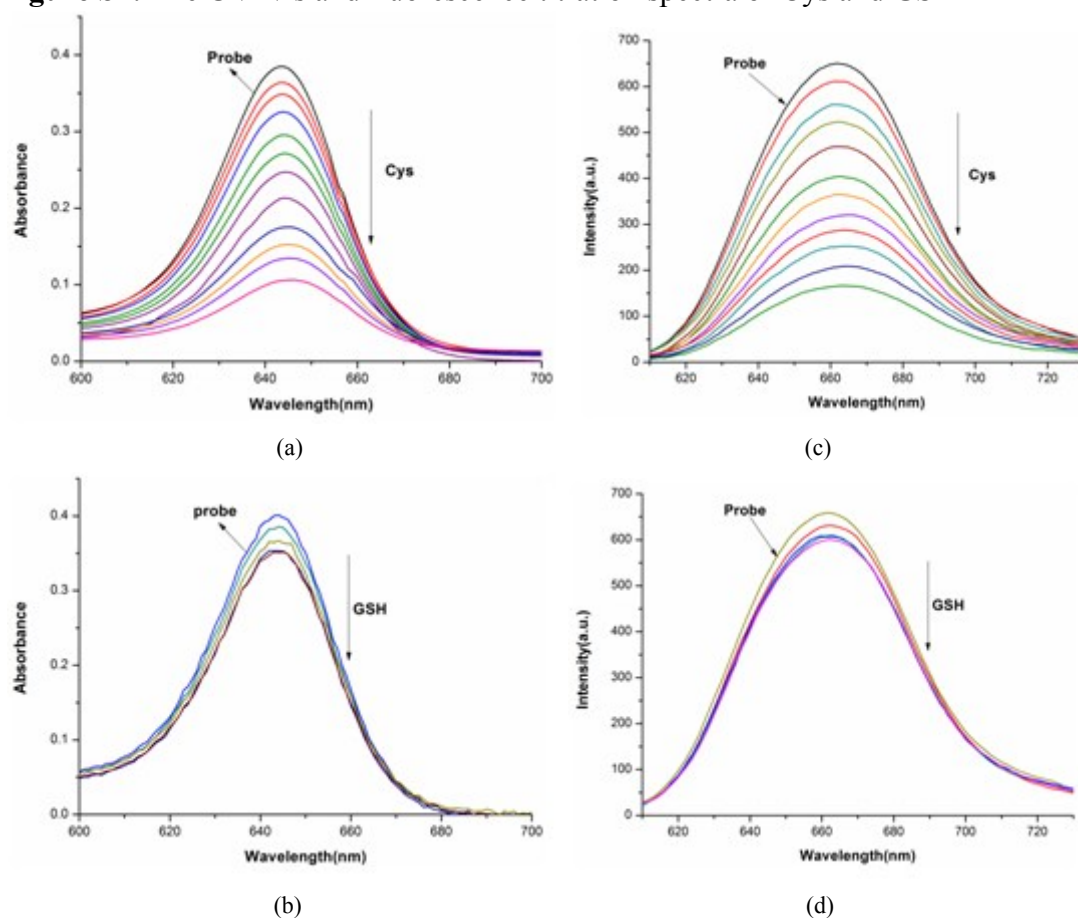

**Figure S2:** Left: UV–vis spectra of the probe (35  $\mu$ M) with Cys (200 $\mu$ M)(a) and GSH (75  $\mu$ M) (b) in CH<sub>3</sub>CN–HEPES buffer (10 mM, pH 9.0, 1 : 1, v/v). Right: Fluorescence spectra of probe (5  $\mu$ M) with Cys (200  $\mu$ M) (c) and GSH (40  $\mu$ M) (d) in CH<sub>3</sub>CN–HEPES buffer (10 mM, pH 9.0, 1 : 1, v/v) ( $\lambda_{\text{ex}}$  = 575nm, slit: 5.0 nm/5.0 nm).

**Figure S3:** The UV–vis and fluorescence titration spectra of ME and MPA

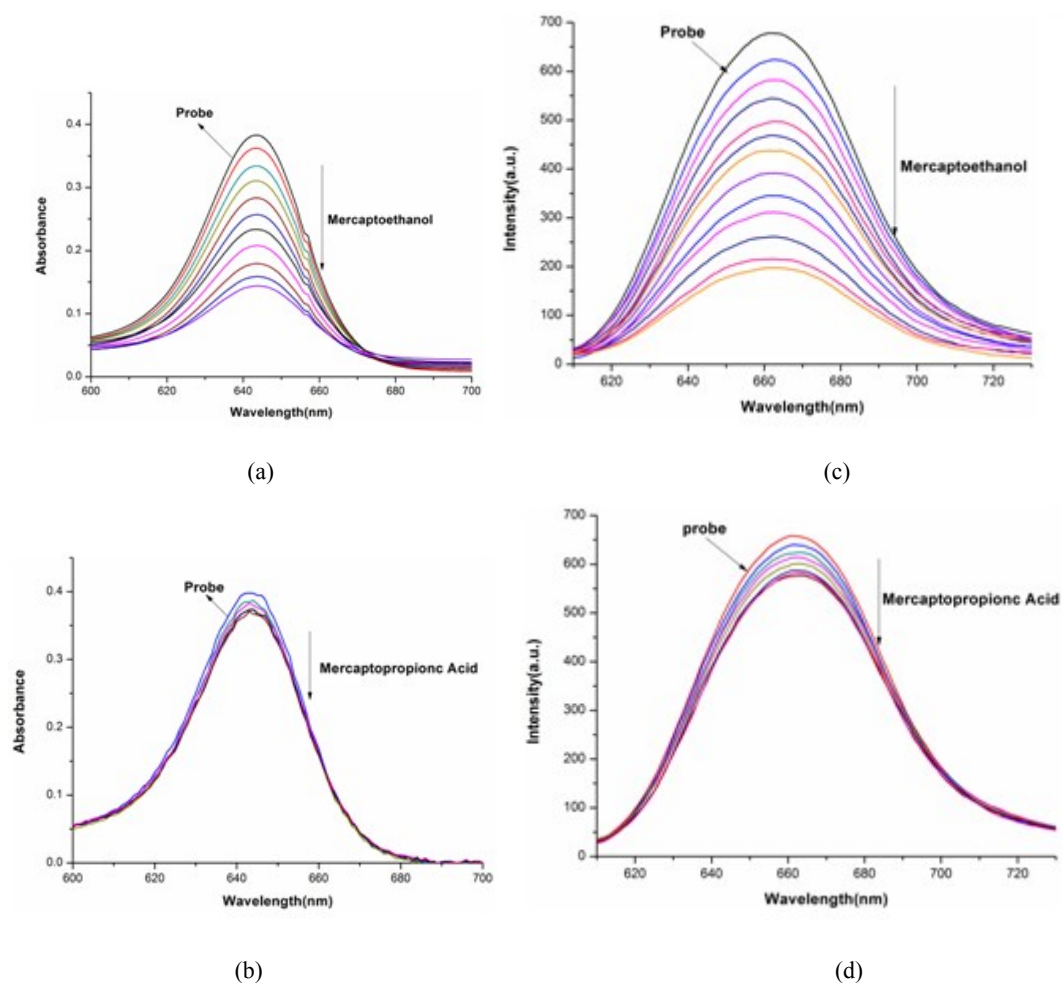

**Figure S3:** Left: UV–vis spectra of the probe (35  $\mu\text{M}$ ) with ME(2-Mercaptoethanol)(80  $\mu\text{M}$ ) **(a)** and MPA (Mercaptopropionic Acid) (80  $\mu\text{M}$ ) **(b)** in  $\text{CH}_3\text{CN}$ –HEPES buffer (10 mM, pH 9.0, 1 : 1, v/v). Right: Fluorescence spectra of probe (5  $\mu\text{M}$ ) with ME (50  $\mu\text{M}$ ) **(c)** and MPA (50  $\mu\text{M}$ ) **(d)** in  $\text{CH}_3\text{CN}$ –HEPES buffer (10 mM, pH 9.0, 1 : 1, v/v) ( $\lambda_{\text{ex}} = 575 \text{ nm}$ , slit: 5.0 nm/5.0 nm)

**Figure S4:** The UV–vis and fluorescence titration spectra of probe when all kinds of analytes added

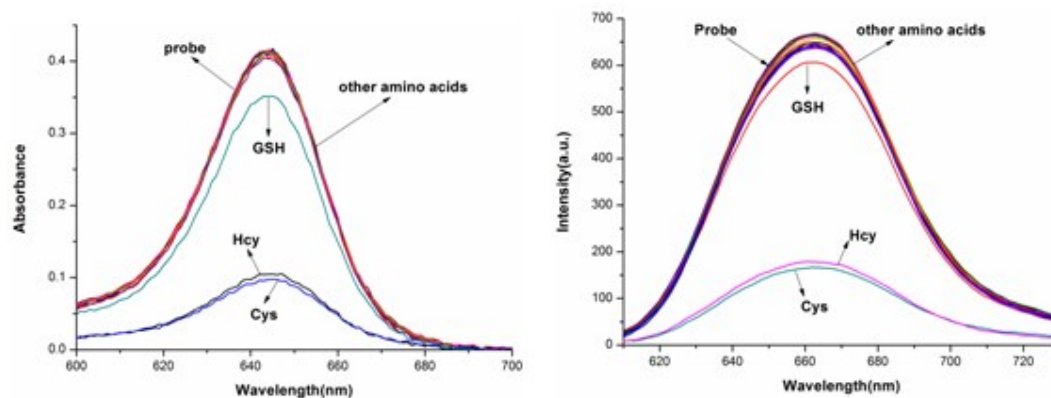

Figure S4: The selectivity of probe 1 for (Ala, Arg, Asp, Gln, Glu, Gly, His, Ile, Leu, Lys, Met, Phe, Pro, Ser, Thr, Tyr, Trp and Val).

**Figure S5:** The detection limits of Cys

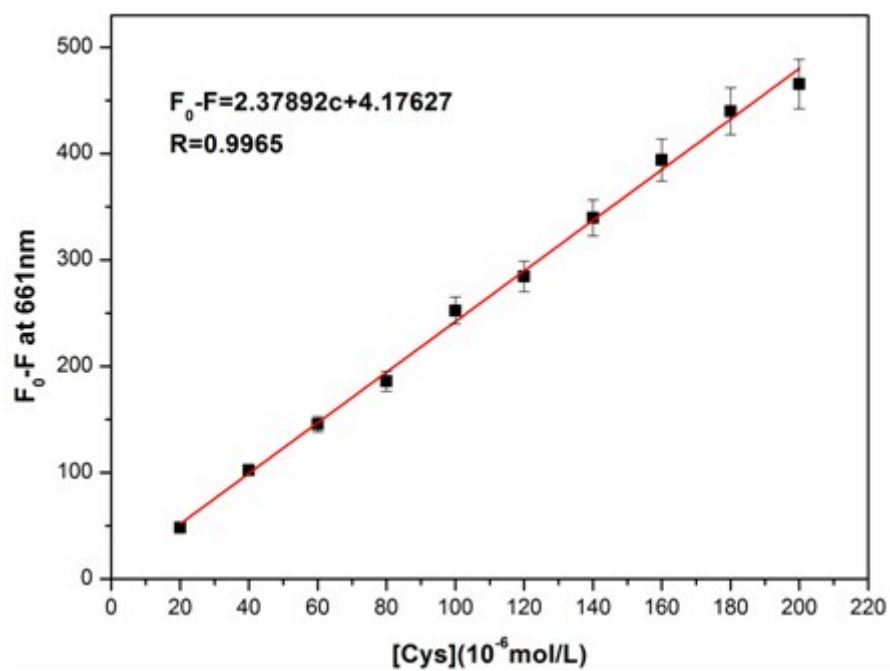

**Figure S6:** Kinetic study of the response of the probe to Hcy and Cys at 25 °C

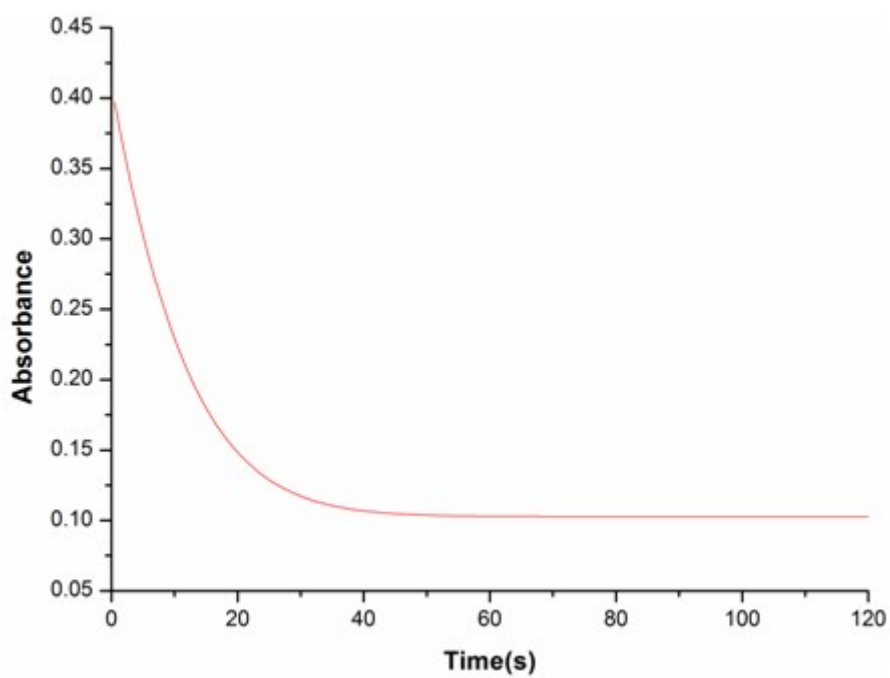

(a)

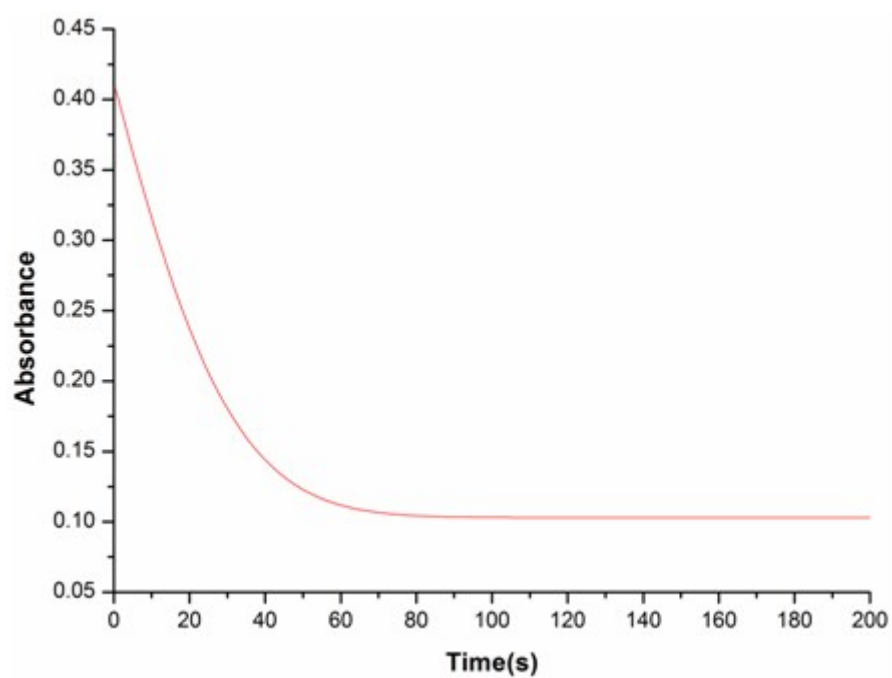

(b)

**Figure S6:** Time-dependent absorbance of probe at 645 nm in the presence of 10 equiv. Hcy (a) and Cys (b).

**Figure S7:** Choice of pH range for the measurements

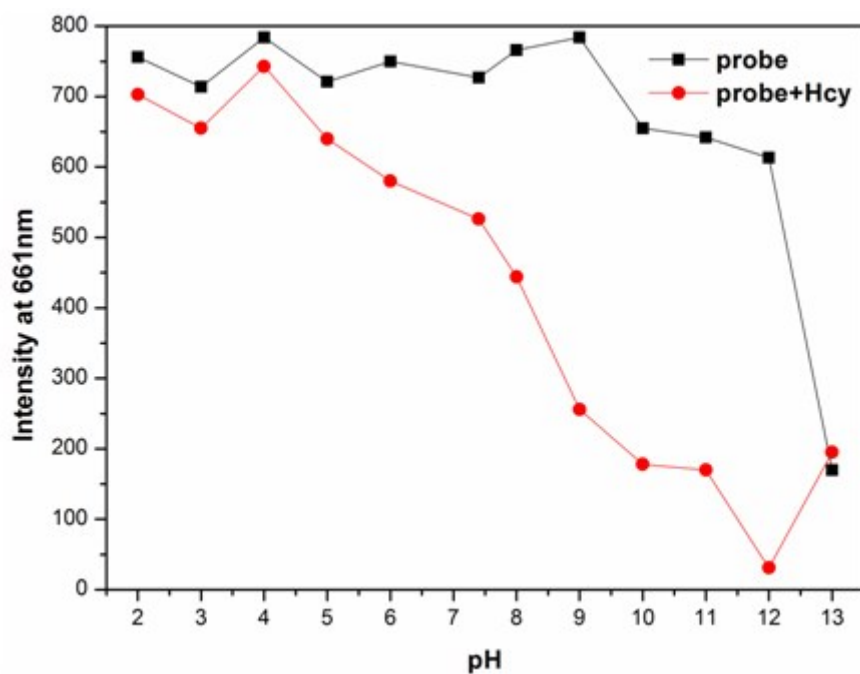

**Figure S7:** The fluorescence intensity of probe at 661 nm in the absence and presence of Hcy under different pH (5  $\mu\text{mol/L}$  probe in  $\text{CH}_3\text{CN}$ –HEPES buffer (10 mM, pH 9.0, 1 : 1, v/v) ( $\lambda_{\text{ex}}$  = 575 nm; Slit: 5nm/5 nm).

**Figure S8:** ESI-MS spectra of the probe-ME adduct

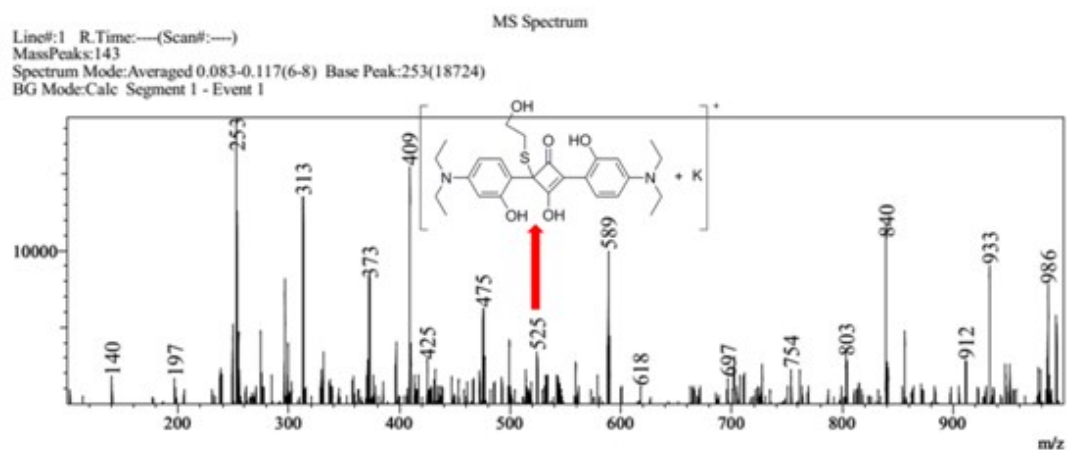

ESI-MS of the probe: m/z: [probe +ME+K]<sup>+</sup> Calcd for C<sub>26</sub>H<sub>34</sub>KN<sub>2</sub>O<sub>5</sub>S 525.18, Found 525. The data was measured with LCMS-8030 (Shimadzu) instrument.
